# Supplementary material for: CeF3-YF3-TbF3 Nanoparticle-Polymer–“Radachlorin” Conjugates for Combined Photodynamic Therapy: Synthesis, Characterization, and Biological Activity
Source: MDPI journal article supplement (doi:10.3390/jcs7060255), 2023-06-19
Supplement: s1 [file s1]

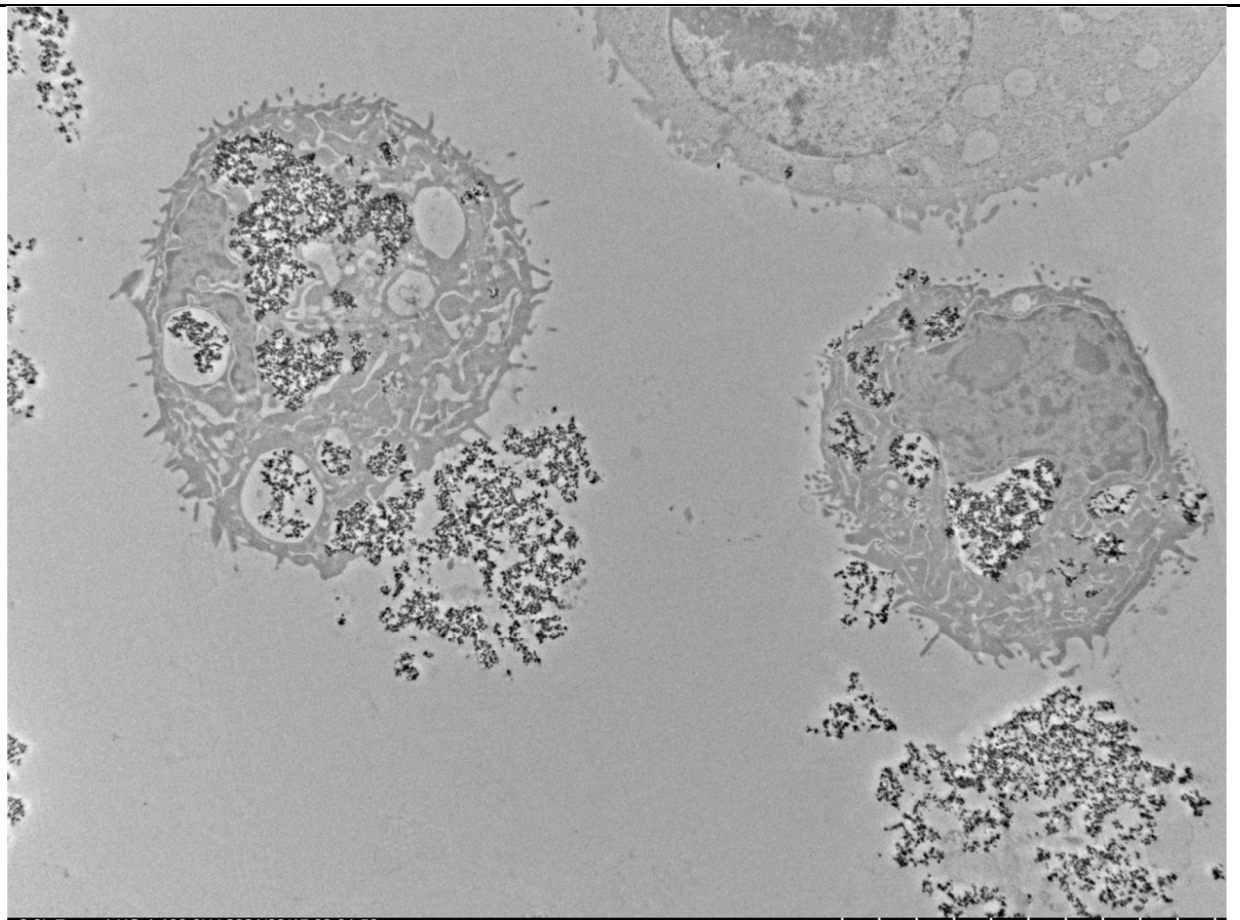

x2.0k Zoom-1 HC-1 100.0kV 2021/03/17 09:01:53  
Hitachi TEM system.

10.0μm

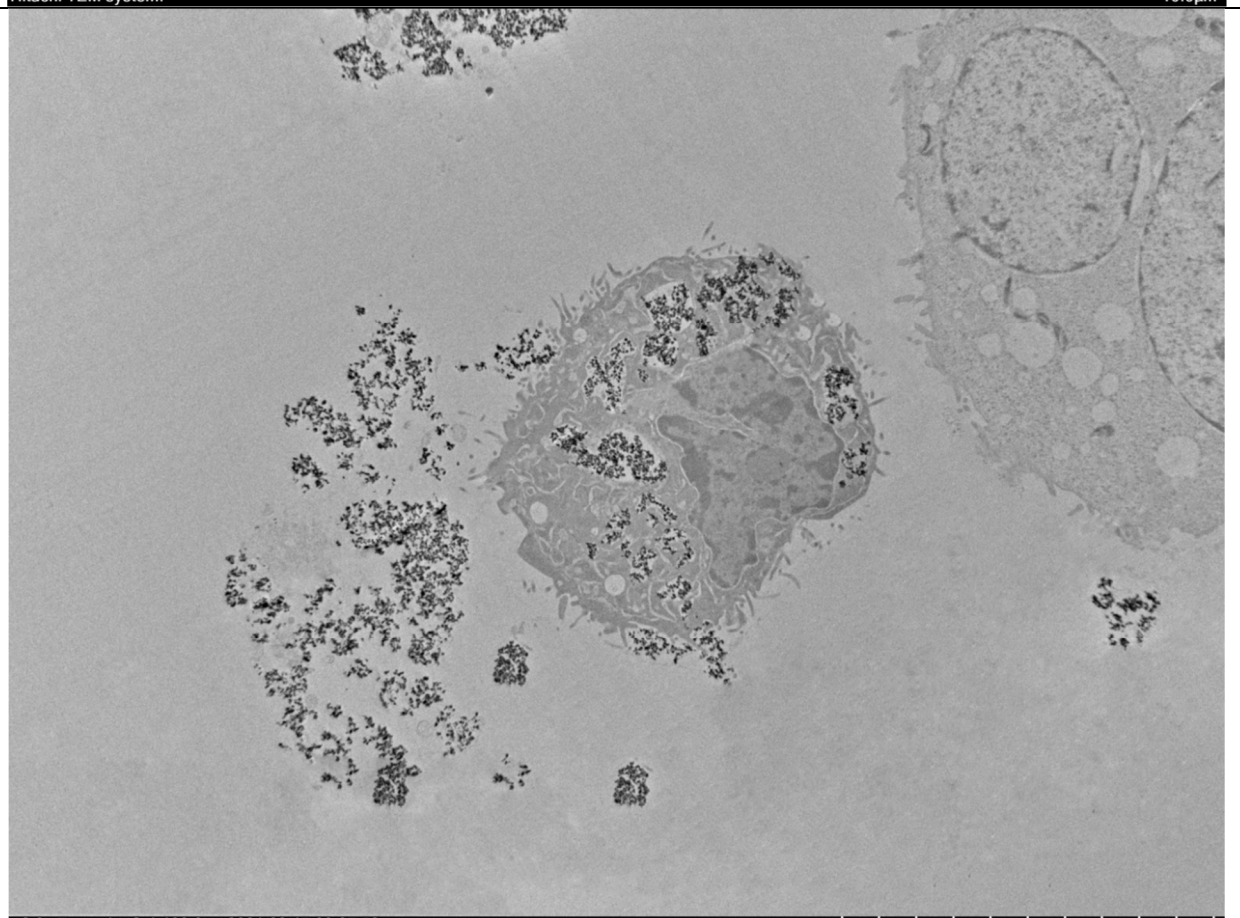

x2.0k Zoom-1 HC-1 100.0kV 2021/03/17 09:07:53  
Hitachi TEM system.

10.0μm

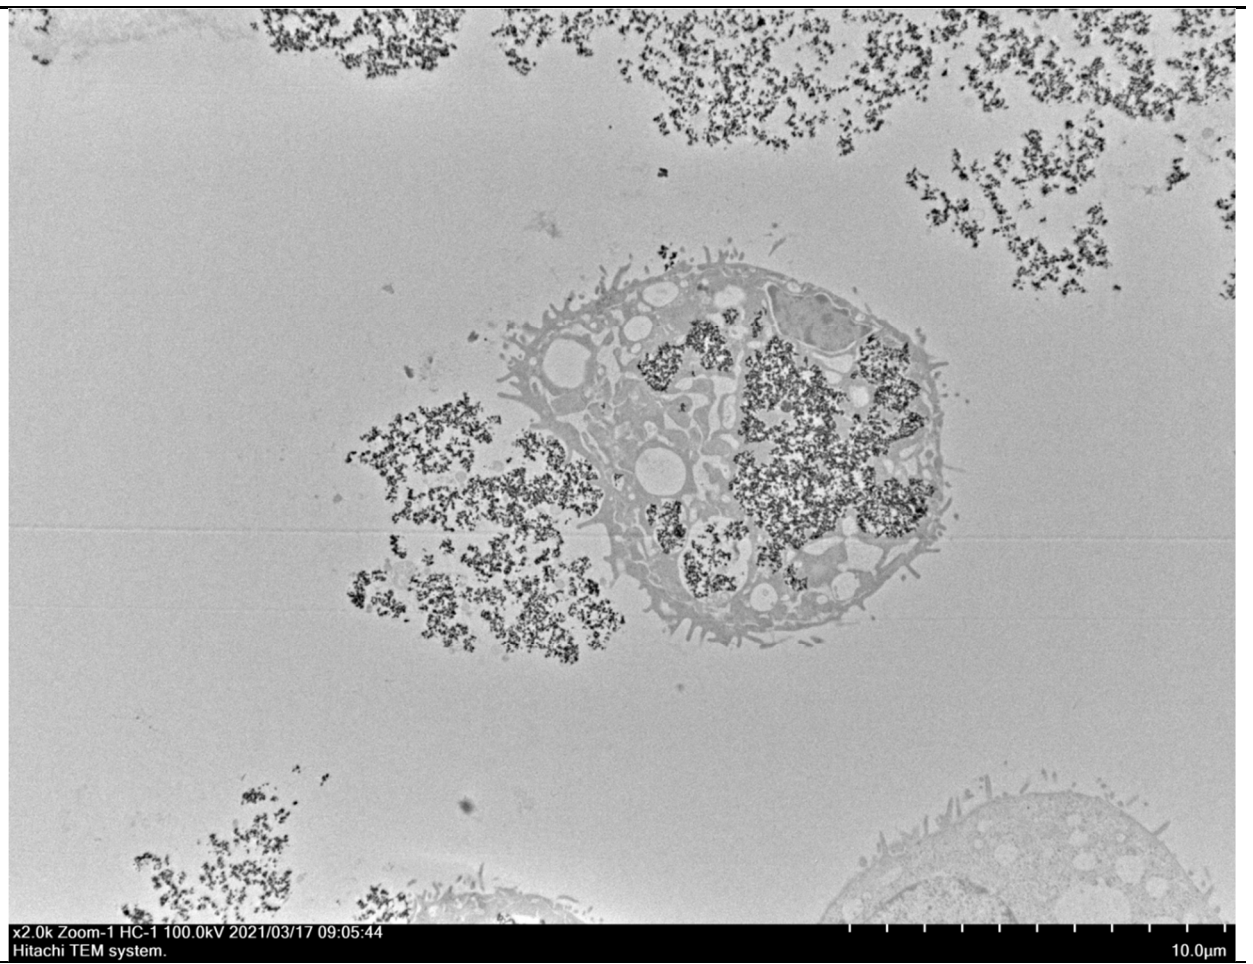

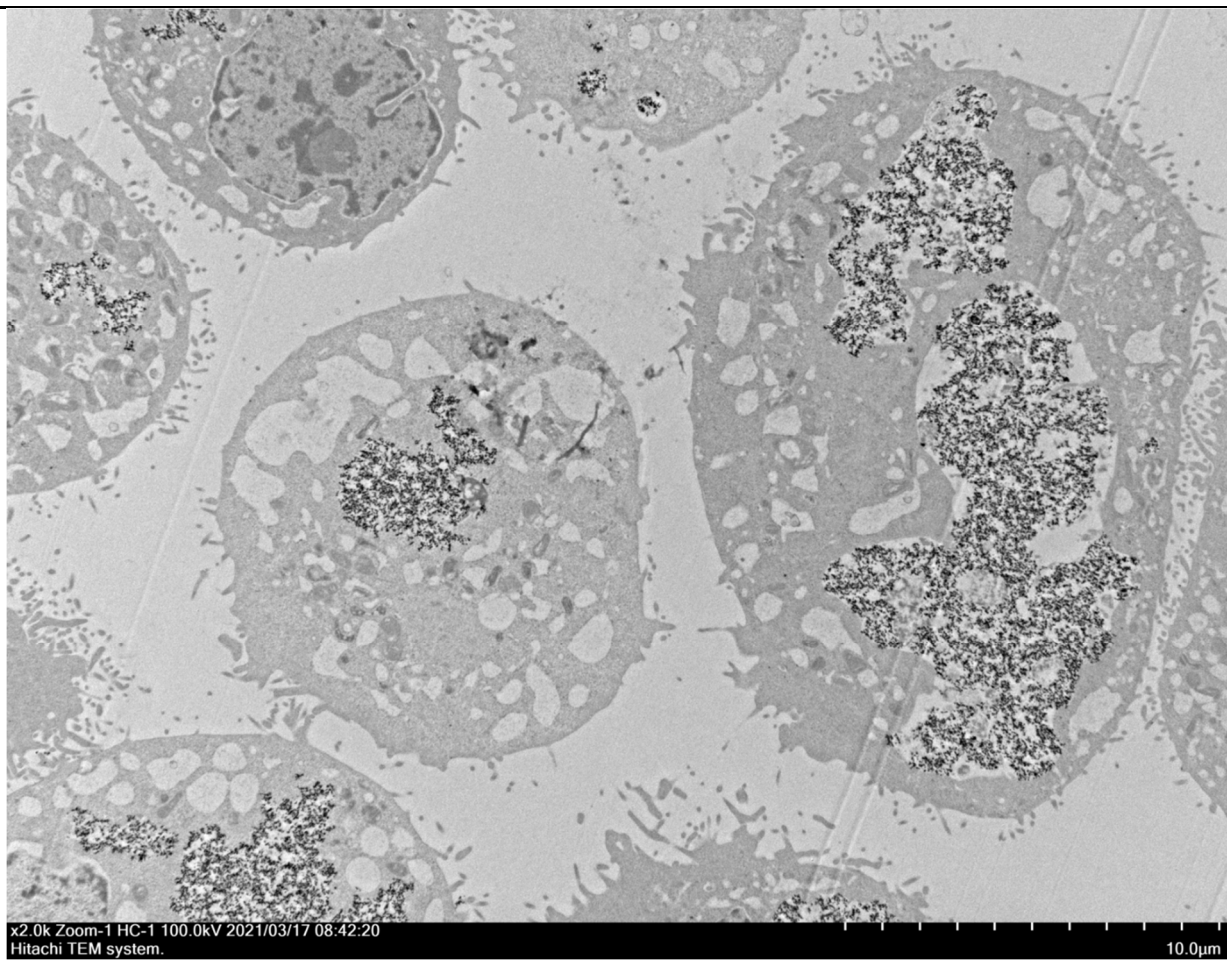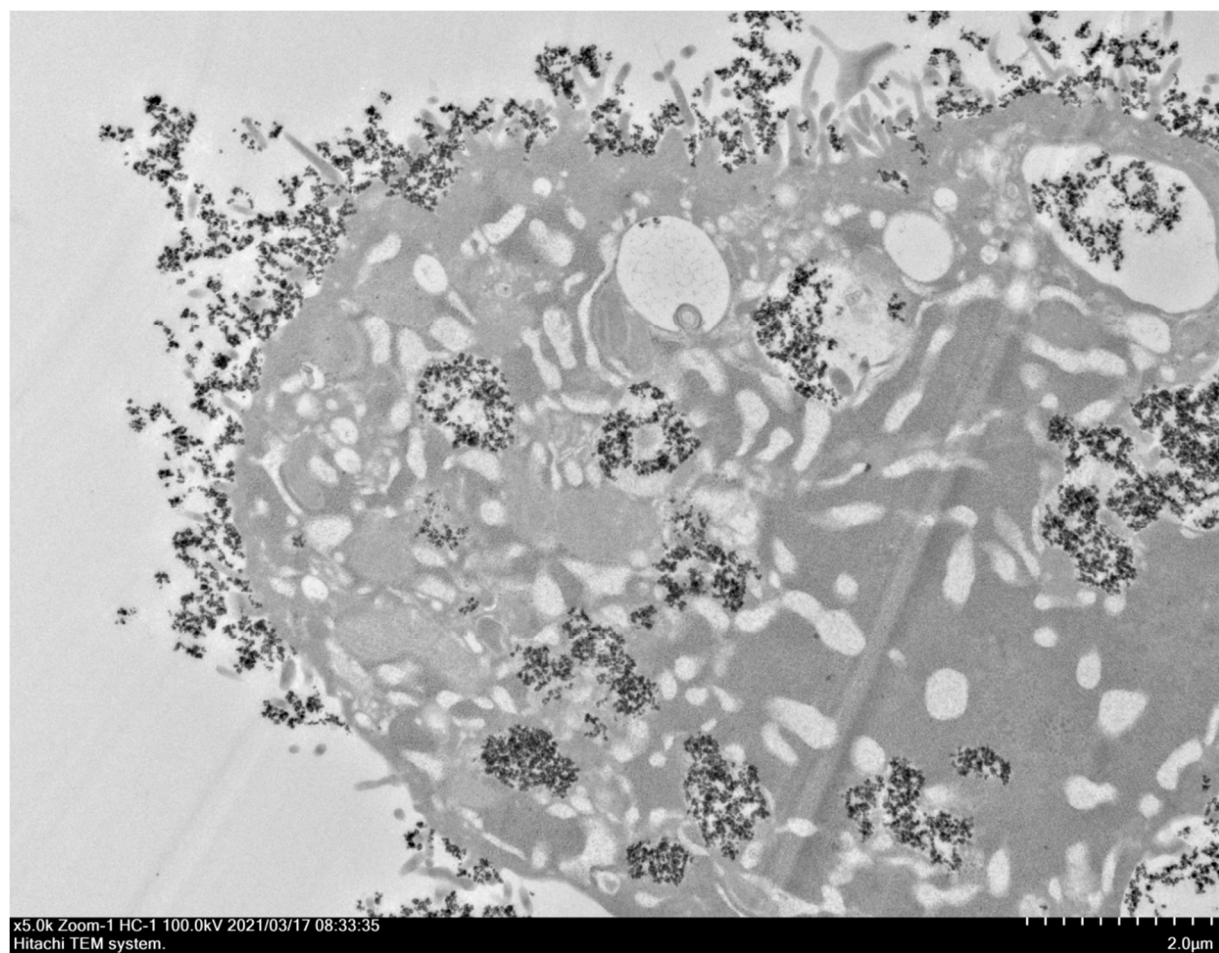

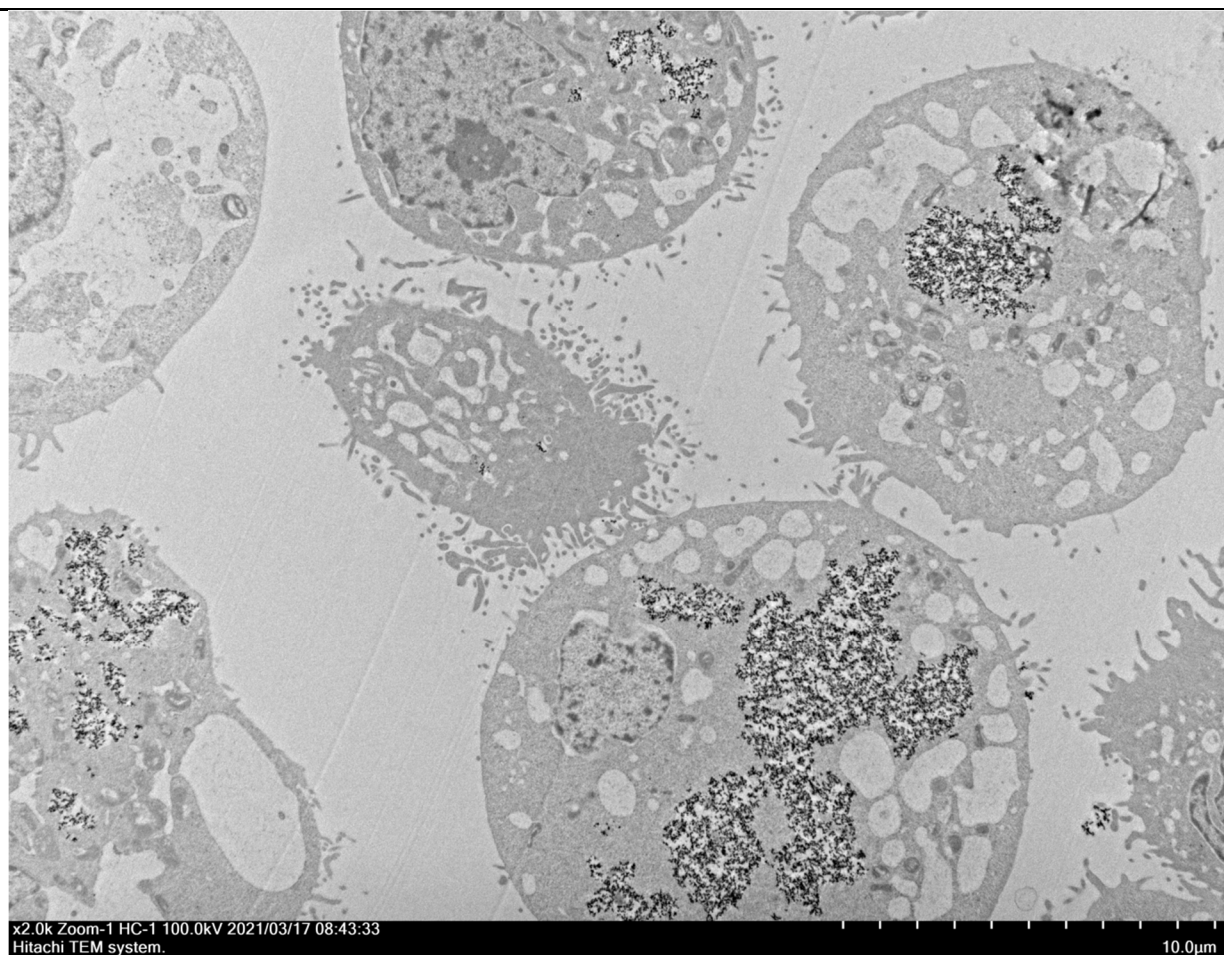

**Figure S1. A** 549 human lung carcinoma cells treated by polymer-coated nanoparticle composite PEI-NP and TEM images of A 549 cells exposed by the for 2 h incubation
